# Supplementary material for: Quantitative and qualitative analysis of the novel antitumor 1,3,4-oxadiazole derivative (GLB) and its metabolites using HPLC-UV and UPLC-QTOF-MS
Source: PubMed Central journal article supplement (PMC4493701; doi:10.1038/srep11906), 2015-07-07
Supplement: srep11906-s1.pdf [file srep11906-s1.pdf]

Quantitative and qualitative analysis of the novel antitumor 1,3,4-oxadiazole derivative (GLB) and its metabolites using HPLC-UV and UPLC-QTOF-MS

Pu Li <sup>1\*</sup>, Xin Wang <sup>1\*</sup>, Jian Li <sup>2</sup>, Zhi-Yun Meng <sup>2</sup>, Shu-Chun Li <sup>3</sup>, Zhong-Jun Li <sup>3</sup>, Ying-Yuan Lu <sup>1</sup>, Hong Ren <sup>1</sup>, Ya-Qing Lou <sup>1</sup>, Chuang Lu <sup>4</sup>, Gui-Fang Dou <sup>2</sup> & Guo-Liang Zhang <sup>1</sup>

## Supplementary data

Appendix Table 1. Plasma concentration - time courses of fructose-based 3-acetyl-2,3-dihydro-1,3,4-oxadiazole (GLB) and its two metabolites M1 and M2 after a single oral dose of 100 mg/kg in rat plasma (Mean  $\pm$ SD, n= 6).

| Time point<br>(h) | Plasma concentration ( $\mu\text{g/mL}$ ) |                   |                   |
|-------------------|-------------------------------------------|-------------------|-------------------|
|                   | GLB                                       | M1                | M2                |
| 0.5               | 0.043 $\pm$ 0.151                         | 0.027 $\pm$ 0.014 | 0.098 $\pm$ 0.020 |
| 1                 | 0.673 $\pm$ 0.065                         | 0.091 $\pm$ 0.021 | 0.250 $\pm$ 0.049 |
| 2                 | 1.405 $\pm$ 0.210                         | 0.242 $\pm$ 0.055 | 0.558 $\pm$ 0.101 |
| 4                 | 1.455 $\pm$ 0.210                         | 0.336 $\pm$ 0.059 | 0.833 $\pm$ 0.193 |
| 6                 | 2.779 $\pm$ 0.887                         | 0.517 $\pm$ 0.113 | 1.357 $\pm$ 0.244 |
| 8                 | 1.602 $\pm$ 0.656                         | 0.443 $\pm$ 0.137 | 1.228 $\pm$ 0.361 |
| 12                | 1.466 $\pm$ 0.672                         | 0.390 $\pm$ 0.114 | 1.254 $\pm$ 0.480 |
| 24                | 0.262 $\pm$ 0.241                         | 0.185 $\pm$ 0.182 | 0.402 $\pm$ 0.447 |
| 36                | 0.139 $\pm$ 0.183                         | 0.037 $\pm$ 0.015 | 0.026 $\pm$ 0.010 |
| 48                | 0.058 $\pm$ 0.063                         | 0.024 $\pm$ 0.020 | 0.020 $\pm$ 0.011 |
| 72                | 0.011 $\pm$ 0.005                         | 0.015 $\pm$ 0.009 | 0.010 $\pm$ 0.005 |
| 96                | 0.016 $\pm$ 0.017                         | 0.025 $\pm$ 0.011 | 0.010 $\pm$ 0.000 |

Appendix Table 2. The parameters of HPLC method optimization and validation for determination of fructose-based 3-acetyl-2,3-dihydro-1,3,4-oxadiazole (GLB) and megestrol acetate (internal standard, IS), including resolution, symmetry, retention time, and extraction efficiency in rat plasma.

| Parameter                 | GLB  | IS   |
|---------------------------|------|------|
| Retention time (min)      | 9.8  | 8.0  |
| Resolution                | 3.6  | 3.6  |
| Symmetry                  | 1.26 | 1.27 |
| Extraction efficiency (%) | 102  | 106  |
| Theoretical plate number  | 6288 | 5234 |

## **Appendix Figure Legend.**

Appendix Figure 1. Full wavelength ultraviolet scanning of fructose-based 3-acetyl-2,3-dihydro-1,3,4-oxadiazole (GLB).

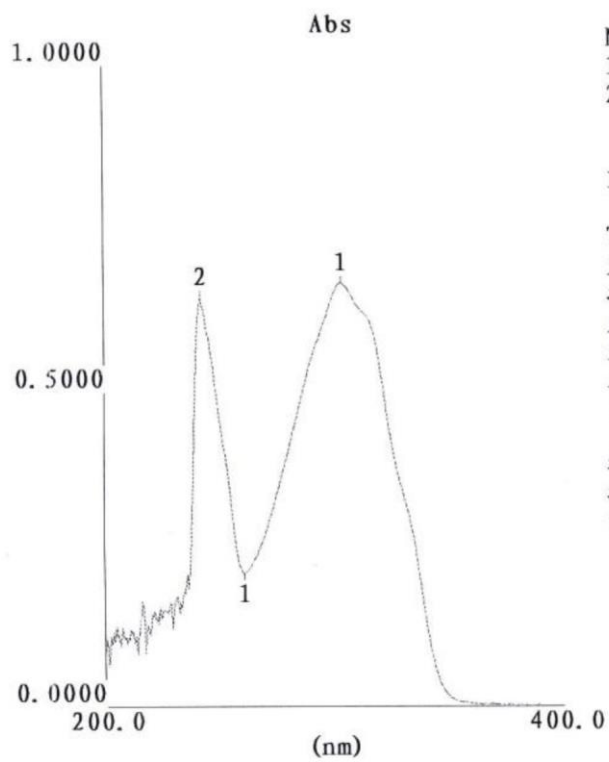

| —峰— |        |       |
|-----|--------|-------|
| No. | nm     | Abs   |
| 1   | 303.50 | 0.646 |
| 2   | 242.00 | 0.624 |
| —谷— |        |       |
| 1   | 261.00 | 0.201 |

TU-1901  
 光度模式: Abs  
 扫描速度: 快速  
 光谱带宽: 2 nm  
 采样间隔: 0.50 nm  
 文件名:  
 日期: 2010-4-30 10:33

样品: GLB  
 操作者:  
 注释:
